# Supplementary material for: The role of building models in the evaluation of heat-related risks
Source: Copernicus journal article supplement (doi:10.5194/nhess-16-963-2016), 2016-04-13
Supplement: Supplementary file 1 [file nhess-16-963-2016-supplement.zip]

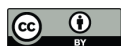

## *Supplement of*

# **The role of building models in the evaluation of heat-related risks**

**O. Buchin et al.**

*Correspondence to:* Oliver Buchin ([oliver.buchin@tu-berlin.de](mailto:oliver.buchin@tu-berlin.de))

- [nhess-16-963-2016-supplement-title-page.pdf](#)
- [BuildingModel.idf](#)

The copyright of individual parts of the supplement might differ from the CC-BY 3.0 licence.
